# Supplementary material for: Intrathecal/Intraventricular Colistin for Antibiotic-Resistant Bacterial CNS Infections in Pediatric Population: A Systematic Review
Source: MDPI journal article supplement (doi:10.3390/tropicalmed7030041), 2022-03-03
Supplement: s1 [file s1]

Table S1. Summary of the main findings of included studies.

| Reference                           | Age      | Gender | Route of infection               | EVD | CSF culture                 | Colistin (duration)       | Other antibiotics                 | Outcome             |
|-------------------------------------|----------|--------|----------------------------------|-----|-----------------------------|---------------------------|-----------------------------------|---------------------|
| Kaplan & Patrick, 1990[6]           | 4 years  | NR     | CSF leak after trauma            | Yes | <i>A. baumannii</i>         | IV, IVT, and IT (20 days) | --                                | Recovered           |
| Fernandez-Viladrich et al., 1999[7] | 16 years | Male   | After neurosurgical intervention | Yes | <i>A. baumannii</i>         | IVT and IT (20 days)      | Meropenem, Tobramycin, Sulbactam  | Severe disability   |
| Ng et al., 2006[8]                  | 4 years  | Male   | After neurosurgical intervention | No  | <i>A. baumannii</i>         | IV, IVT, and IT (24 days) | Amikacin                          | Severe disability   |
| Yagmur & Esen, 2006[9]              | 16 years | Male   | After neurosurgical intervention | Yes | <i>P. aeruginosa</i>        | IVT and IT (21 days)      | IV amikacin                       | Recovered           |
| Dalgic et al., 2009[10]             | 2 months | Female | After neurosurgical intervention | Yes | <i>A. baumannii</i>         | IV, IVT, and IT (27 days) | --                                | Recovered           |
| Dalgic et al., 2009[10]             | 2 months | Female | After neurosurgical intervention | Yes | <i>K. pneumoniae</i>        | IV, IVT, and IT (14 days) | Ciprofloxacin                     | Recovered           |
| Özdemir et al., 2010[11]            | 3 years  | Female | After neurosurgical intervention | Yes | <i>A. baumannii</i>         | IV, IVT, and IT (35 days) | Meropenem, amikacin, ampicillin   | Recovered           |
| Cascio et al., 2010[12]             | 5 years  | Male   | After neurosurgical intervention | Yes | <i>Enterobacter cloacae</i> | IV, IVT, and IT (14 days) | Teicoplanin, Rifampin, cefazidime | Moderate disability |
| Saleem et al., 2011[13]             | 5 months | Male   | After neurosurgical intervention | Yes | <i>A. baumannii</i>         | IV, IVT, and IT (24 days) | --                                | Died                |
| Saleem et al., 2011[13]             | 9 months | Male   | After neurosurgical intervention | No  | <i>A. baumannii</i>         | IV, IVT, and IT (6 days)  | --                                | Recovered           |
| Saleem et al., 2011[13]             | 3 months | Female | After neurosurgical intervention | Yes | <i>A. baumannii</i>         | IV, IVT, and IT (11 days) | --                                | Recovered           |
| Saleem et al., 2011[13]             | 9 years  | Female | After neurosurgical intervention | Yes | <i>A. baumannii</i>         | IV, IVT, and IT (21 days) | --                                | Recovered           |
| Wang et al., 2012[14]               | 15 years | Male   | After neurosurgical intervention | Yes | <i>A. baumannii</i>         | IV, IVT, and IT (24 days) | Meropenem                         | Recovered           |
| Karaïskos et al., 2013[4]           | 18 years | Female | After neurosurgical intervention | Yes | <i>A. baumannii</i>         | IV, IVT, and IT (17 days) | Carbapenem, Sulbactam.            | Recovered           |
| Bargiacchi et al., 2014[15]         | 18 years | Male   | After neurosurgical intervention | Yes | <i>P. aeruginosa</i>        | IV, IVT, and IT (18 days) | Ciprofloxacin                     | Recovered           |
| Tekgündüz et al., 2015[16]          | <1 month | Male   | After neurosurgical intervention | Yes | <i>A. baumannii</i>         | IV, IVT, and IT (9 days)  | Vancomycin                        | Recovered           |

|                                       |           |        |                                  |     |                                   |                           |                                                |                     |
|---------------------------------------|-----------|--------|----------------------------------|-----|-----------------------------------|---------------------------|------------------------------------------------|---------------------|
| Santos et al., 2015[17]               | 15 months | Male   | After neurosurgical intervention | Yes | <i>E. coli, K. pneumoniae</i>     | IV, IVT, and IT           | Meropenem                                      | Recovered           |
| Santos et al., 2015[17]               | 11 months | Male   | After neurosurgical intervention | Yes | <i>A. baumannii</i>               | IV, IVT, and IT           | Meropenem, Amikacin                            | Recovered           |
| Tekgunduz et al., 2015[18]            | 2 months  | Male   | After neurosurgical intervention | Yes | <i>A. baumannii</i>               | IV, IVT, and IT           | Gentamicin, Sulbactam                          | Moderate disability |
| Mahabeer et al., 2018[19]             | 1 month   | Male   | Healthcare-associated infection  | Yes | <i>A. baumannii</i>               | IV, IVT, and IT           | Gentamicin                                     | Recovered           |
| Hiremath et al., 2018 <sup>[20]</sup> | 17 years  | Female | After neurosurgical intervention | Yes | <i>A. baumannii</i>               | IVT and IT (11 days)      | IV meropenem and teicoplanin                   | recovered           |
| Abad-Restrepo et al., 2018[21]        | 11 years  | Female | After neurosurgical intervention | Yes | <i>P. aeruginosa</i>              | IV, IVT, and IT (42 days) | Vancomycin                                     | Recovered           |
| AlZailaie et al., 2018[22]            | 5 years   | Female | After neurosurgical intervention | Yes | <i>A. baumannii</i>               | IV, IVT, and IT (49 days) | --                                             | Recovered           |
| Al Yazidi et al., 2018[23]            | < 1 month | Male   | After neurosurgical intervention | Yes | <i>Enterobacter cloacae</i>       | IV, IVT, and IT (9 days)  | Meropenem, Ciprofloxacin                       | Died                |
| Hussain et al 2021 [24]               | 1 month   | Female | After neurosurgical intervention | Yes | <i>E.coli, K pneumoniae</i>       | IV, IVT, and IT (7 days)  | IV meropenem, vancomycin                       | Recovered           |
| Hussain et al 2021 [24]               | < 1 month | Male   | After neurosurgical intervention | Yes | <i>A. baumannii</i>               | IV, IVT, and IT (7 days)  | IV meropenem, vancomycin                       | Recovered           |
| Hussain et al 2021 [24]               | < 1 month | Male   | Healthcare-associated infection  | Yes | <i>A. baumannii</i>               | IV, IVT, and IT (5 days)  | IV meropenem, vancomycin                       | Recovered           |
| Hussain et al 2021 [24]               | < 1 month | Female | After neurosurgical intervention | Yes | <i>A. baumannii</i>               | IV, IVT, and IT (8 days)  | IV cefotaxime, Meropenem, amikacin, colistin   | Recovered           |
| Hussain et al 2021 [24]               | < 1 month | Male   | Healthcare-associated infection  | Yes | <i>A. baumannii</i>               | IV, IVT, and IT (7 days)  | IV cefotaxime, Meropenem, amikacin             | Moderate disability |
| Hussain et al 2021 [24]               | < 1 month | Male   | Healthcare-associated infection  | Yes | <i>A. baumannii</i>               | IV, IVT, and IT (3 days)  | IV cefotaxime, Meropenem, amikacin, vancomycin | Died                |
| Hussain et al 2021 [24]               | < 1 month | Male   | After neurosurgical intervention | Yes | <i>K pneumoniae, A. baumannii</i> | IV, IVT, and IT (8 days)  | IV meropenem, Ceftazidime, amikacin            | Recovered           |

EVD: External ventricular drain

MDR: Multidrug resistant

NR: Not reported

IVT: Intraventricular therapy

ITH: Intrathecal,
